# Supplementary material for: Exploring the conceptual framework of a health-promotion faculty from the perspective of members: a qualitative study
Source: HighWire-hosted journal article supplement (doi:10.1136/bmjopen-2023-073059), 2023-05-01
Supplement: bmjopen-2023-073059supp001_data_supplement.pdf [file bmjopen-2023-073059supp001_data_supplement.pdf]

## Health promotion faculty interview guide

### General Questions

1-what's your major /occupation

2- what year are you in at the faculty /How many years of work experience do you have at the faculty

### Guidance Questions

1- How is your health status?

a- What symptoms in your body made you feel this way about your health status?

b- Which aspect of your health is in a better / worse state

(Physical, Spiritual, Psychological, and social health)/Why?

2- Has studying/working here affected your health status?

a- Can you explain exactly what conditions caused this effect?

b- How can this situation get changed?

c- In your opinion, what conditions/facilities can help maintain or improve your health at the faculty?

d- What should the management team do to improve health in this environment?

3- Can you describe the image of a health promotion faculty in your mind?
